# Supplementary material
Source: Springer Nature journal article supplement (https://www.springerprofessional.de/resource/supplementary/13638_2011_21_MOESM7_ESM.pdf/11897282)

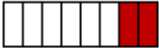

*Light load*

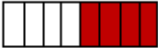

*Medium load*

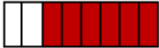

*Heavy load*

Supplement: MOESM7 [file 11897282]
